# Supplementary material for: Efficient Generation of Pathogenic A-to-G Mutations in Human Tripronuclear Embryos via ABE-Mediated Base Editing
Source: PubMed Central journal article supplement — Mol Ther Nucleic Acids. 2019 Jun 5;17:289–96. doi: 10.1016/j.omtn.2019.05.021 (PMC6611966; doi:10.1016/j.omtn.2019.05.021), 2019-06-05
Supplement: mmc1.pdf [file mmc1.pdf]

OMTN, Volume 17

## **Supplemental Information**

### **Efficient Generation of Pathogenic A-to-G Mutations in Human Tripronuclear Embryos via ABE-Mediated Base Editing**

**Guanglei Li, Xinyi Liu, Shisheng Huang, Yanting Zeng, Guang Yang, Zongyang Lu, Yu Zhang, Xu Ma, Lisheng Wang, Xingxu Huang, and Jianqiao Liu**

## **SUPPLEMENTARY INFORMATION**

Supplementary Figure 1 Detection of pathogenic A-to-G substitution induced by ABE in cells

Supplementary Figure 2 Detection of indels for *TTR* and *RPE65*

Supplementary Figure 3 Simultaneous editing of multiple sites.

Supplementary Figure 4 The editing efficiency for *ALFOB*, and *KCNJ11*

Supplementary Table 1 Summary of the used embryos and editing efficiency

Supplementary Table 2 Summary of the off-target sites for *TTR*

Supplementary Table 3 Summary of the off-target sites for *RPE65*

Supplementary Table 4 Primers used in the study

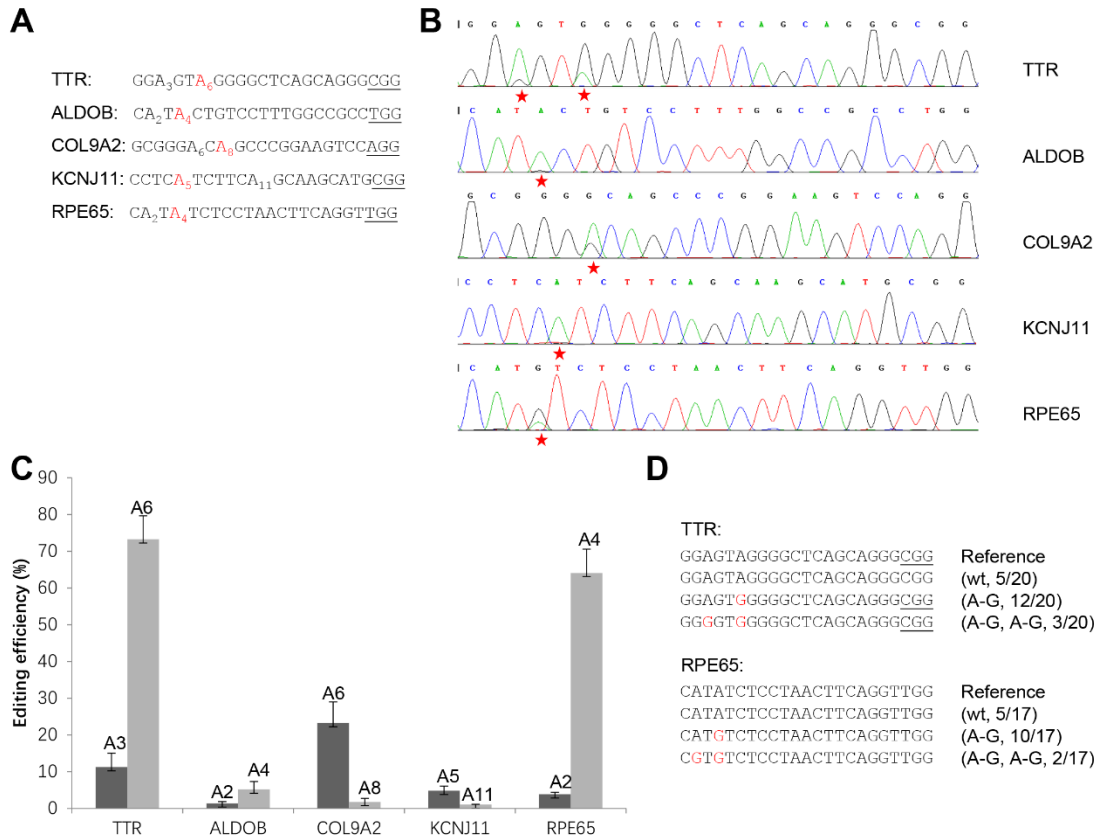

Supplementary Figure 1 Detection of pathogenic A-to-G substitution induced by ABE in cells.

A. The representative pathogenic mutations. Five human genes with reported pathogenic mutation were selected, and the related pathogenic points are highlighted in red. The PAM sequences are underlined.

B. The representative chromatogram of the Sanger sequencing of target sites from genomic DNA of HEK293T cells transfected with ABE and related sgRNAs. The red stars indicate the conversion of A-to-G.

C. The editing efficiency of A-to-G within the target sites. Data from three independent experiments were shown as means  $\pm$  s.d.

D. Sequences of the PCR product after TA cloning for *TTR* and *RPE65*. The PAM sequences are underlined; the modified bases highlighted in red. N/N indicates bacterial colonies with base editing out of total number of the sequenced bacterial colonies.

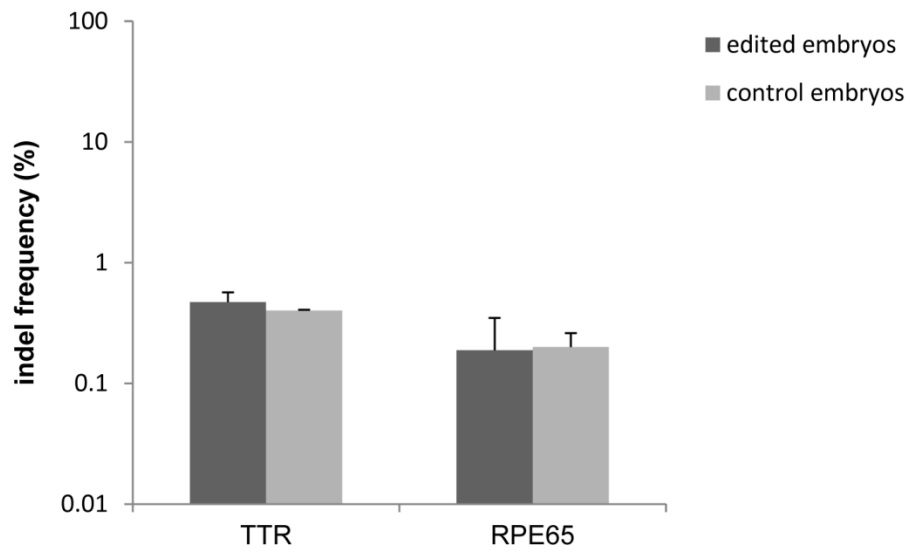

Supplementary Figure 2 Detection of indels for *TTR* and *RPE65*

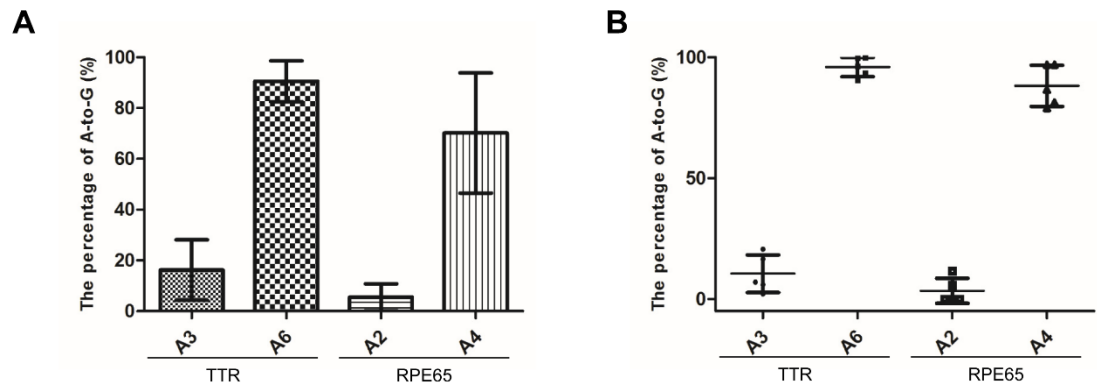

Supplementary Figure 3 Simultaneous editing of multiple sites. A. The editing efficiency was calculated depending on the chromatogram of the Sanger sequencing of target sites. B. The editing efficiency was calculated depending on the deep sequencing.

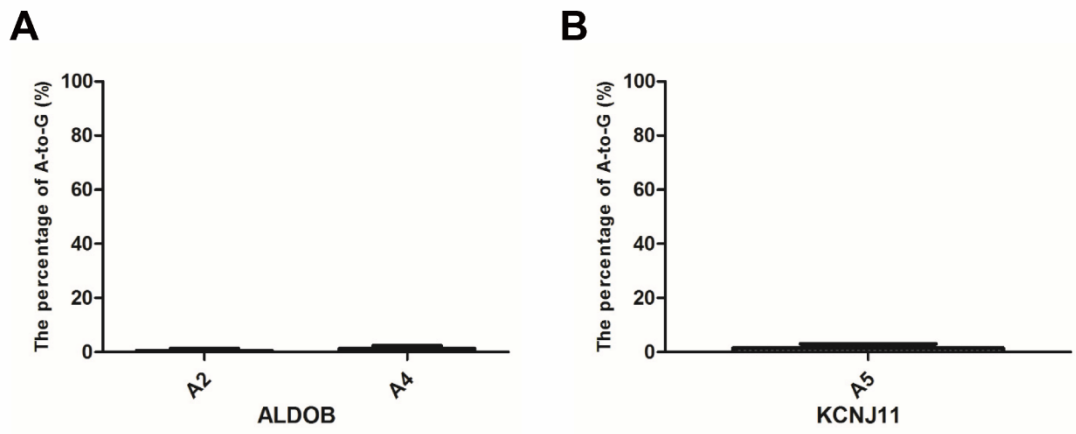

Supplementary Figure 4 The editing efficiency for *ALDOB* and *KCNJ11* in human embryos.

Supplementary Table 1 Summary of the used embryos and editing efficiency

| Used sgRNAs    | Embryo No.      | Editing efficiency (A-to-G) |      | Used sgRNAs    | Embryo No.  | Editing efficiency (A-to-G) |      | Used sgRNAs         | Embryo No.          | Editing efficiency (A-to-G) |     |     |
|----------------|-----------------|-----------------------------|------|----------------|-------------|-----------------------------|------|---------------------|---------------------|-----------------------------|-----|-----|
| 1. ABE+ SITE6  | Position        | A3                          | A7   | 4. ABE+ COL9A2 | Position    | A2                          | A4   | 8. ABE+ TTR         | #68                 | 22%                         | 86% |     |
|                | #1              | 7%                          | 41%  |                | #35         | 8%                          | 55%  |                     | #69                 | 14%                         | 89% |     |
|                | #2              | 0%                          | 39%  |                | #36         | 3%                          | 90%  |                     | #70                 | 22%                         | 95% |     |
|                | #3              | 0%                          | 49%  |                | #37         | 78%                         | 91%  |                     | #71                 | 35%                         | 89% |     |
|                | #4              | 0%                          | 60%  |                | #38         | 37%                         | 100% |                     | #72                 | 2%                          | 94% |     |
|                | #5 <sup>a</sup> | 0%                          | 88%  | 5. ABE+ KCNJ11 | Position    | A5                          |      |                     | #73                 | 7%                          | 98% |     |
|                | #6              | 25%                         | 70%  |                | #39         | 0%                          |      |                     | #74                 | 8%                          | 90% |     |
|                | #7              | 5%                          | 48%  |                | #40         | 2%                          |      |                     | #75                 | 35%                         | 71% |     |
|                | #8              | 45%                         | 65%  |                | #41         | 0%                          |      |                     | #76                 | 5%                          | 98% |     |
|                | #9              | 44%                         | 93%  |                | #42         | 4%                          |      |                     | #77                 | 12%                         | 96% |     |
|                | #10             | 0%                          | 45%  |                | #43         | 0%                          |      |                     | Position            | A2                          | A4  |     |
|                | #11             | 6%                          | 55%  |                | #44         | 3%                          |      |                     | #68                 | 12%                         | 50% |     |
| #12            | 0%              | 100%                        | #45  |                | 1%          |                             | #69  | 0%                  | 50%                 |                             |     |     |
| 2. ABE+ SITE2  | Position        | A2                          | A5   | A8             | 6. ABE+ TTR | Position                    | A3   | A6                  | 8. ABE+ RPE65       | #70                         | 4%  | 87% |
|                | #13             | 4%                          | 99%  | 1%             |             | #46                         | 0%   | 78%                 |                     | #71                         | 3%  | 70% |
|                | #14             | 4%                          | 100% | 3%             |             | #47                         | 80%  | 90%                 |                     | #72                         | 1%  | 98% |
|                | #15             | 3%                          | 89%  | 10%            |             | #48                         | 18%  | 80%                 |                     | #73                         | 16% | 25% |
|                | #16             | 4%                          | 96%  | 2%             |             | #49                         | 18%  | 92%                 |                     | #74                         | 2%  | 97% |
|                | #17             | 3%                          | 99%  | 8%             |             | #50                         | 13%  | 88%                 |                     | #75                         | 3%  | 60% |
|                | #18             | 2%                          | 99%  | 1%             |             | #51                         | 6%   | 90%                 |                     | #76                         | 10% | 85% |
|                | #19             | 2%                          | 86%  | 2%             |             | #52                         | 1%   | 82%                 |                     | #77                         | 4%  | 80% |
|                | #20             | 6%                          | 91%  | 3%             |             | #53                         | 2%   | 95%                 |                     | Position                    | A3  | A6  |
|                | #21             | 3%                          | 50%  | 16%            |             | #54                         | 35%  | 86%                 |                     | #78                         | 14% | 95% |
|                | #22             | 8%                          | 99%  | 14%            |             | #55                         | 14%  | 74%                 |                     | #79                         | 0   | 96% |
|                | #23             | 0%                          | 100% | 0%             |             | #56                         | 9%   | 70%                 |                     | #80                         | 0   | 80% |
| #24            | 1%              | 83%                         | 2%   | #57            | 9%          | 87%                         | #81  | 33%                 | 100%                |                             |     |     |
| 3. ABE+ ALDOB  | Position        | A2                          | A4   | 7. ABE+ RPE65  | Position    | A2                          | A4   | 10. ABE-NG+ BCS1L-1 | #82                 | 10%                         | 87% |     |
|                | #25             | 0%                          | 2%   |                | #58         | 12%                         | 60%  |                     | #83                 | 30%                         | 89% |     |
|                | #26             | 0%                          | 0%   |                | #59         | 0%                          | 38%  |                     | Position            | A4                          | A7  |     |
|                | #27             | 1%                          | 3%   |                | #60         | 8%                          | 64%  |                     | #85                 | 19%                         | 11% |     |
|                | #28             | 2%                          | 1%   |                | #61         | 1%                          | 42%  |                     | #86                 | 26%                         | 15% |     |
|                | #29             | 0%                          | 0%   |                | #62         | 0%                          | 50%  |                     | #87                 | 21%                         | 14% |     |
|                | #30             | 1%                          | 1%   |                | #63         | 0%                          | 26%  |                     | 11. ABE-NG+ BCS1L-2 | Position                    | A5  | A7  |
| #31            | 0%              | 2%                          | #64  |                | 0%          | 70%                         | #88  | 42%                 |                     | 24%                         |     |     |
| 4. ABE+ COL9A2 | Position        | A6                          | A8   |                | #65         | 0%                          | 53%  | #89                 |                     | 33%                         | 0   |     |
|                | #32             | 29%                         | 87%  |                | #66         | 2%                          | 60%  | #90                 | 32%                 | 0                           |     |     |
|                | #33             | 52%                         | 30%  | #67            | 5%          | 41%                         |      |                     |                     |                             |     |     |
|                | #34             | 36%                         | 48%  | Position       | A3          | A6                          |      |                     |                     |                             |     |     |

<sup>a</sup> The embryos marked in red were subjected for deep sequencing.

Supplementary Table 2 Summary of the off-target sites for TTR

| Position    | 1 | 2 | 3 | 4 | 5 | 6 | 7 | 8 | 9 | 10 | 11 | 12 | 13 | 14 | 15 | 16 | 17 | 18 | 19 | 20 | N | G | G  | Location |           |           |           |
|-------------|---|---|---|---|---|---|---|---|---|----|----|----|----|----|----|----|----|----|----|----|---|---|----|----------|-----------|-----------|-----------|
| Target site | G | G | A | G | T | A | G | G | G | G  | C  | T  | C  | A  | G  | C  | A  | G  | G  | G  | C | G | G  | Chr.     | Strand    | Start     | End       |
| TTR-OF1     | A | G | A | G | T | G | G | G | G | C  | T  | C  | A  | G  | C  | A  | G  | G  | G  | T  | G | G | 7  | -        | 101886959 | 101886981 |           |
| TTR-OF2     | G | G | A | G | C | A | C | A | G | G  | C  | T  | C  | A  | G  | C  | A  | G  | G  | G  | T | G | G  | 9        | -         | 134834935 | 134834957 |
| TTR-OF3     | C | G | G | G | C | A | G | G | C | G  | C  | T  | C  | A  | G  | C  | A  | G  | G  | G  | T | G | G  | 1        | -         | 54459729  | 54459751  |
| TTR-OF4     | G | G | G | G | G | G | C | G | G | G  | C  | T  | C  | A  | G  | C  | A  | G  | G  | G  | A | G | G  | 1        | -         | 233055471 | 233055493 |
| TTR-OF5     | A | G | C | C | T | A | G | G | C | C  | T  | C  | A  | G  | C  | A  | G  | G  | G  | A  | G | G | 16 | -        | 3144125   | 3144147   |           |
| TTR-OF6     | G | C | C | G | T | C | G | G | C | G  | C  | T  | C  | A  | G  | C  | A  | G  | G  | G  | A | G | G  | 1        | -         | 217186869 | 217186891 |
| TTR-OF7     | G | C | C | G | G | A | G | G | G | G  | C  | T  | C  | A  | G  | C  | A  | G  | G  | G  | C | A | G  | 19       | -         | 35925685  | 35925707  |
| TTR-OF8     | G | G | C | C | A | A | G | G | G | G  | C  | T  | C  | A  | G  | C  | A  | G  | G  | G  | A | G | G  | 2        | -         | 16397188  | 16397210  |
| TTR-OF9     | A | G | A | G | C | T | G | G | G | G  | C  | T  | C  | A  | G  | C  | A  | G  | G  | G  | A | G | G  | 11       | +         | 119792041 | 119792063 |
| TTR-OF10    | G | G | T | G | T | T | G | G | G | G  | C  | T  | C  | A  | G  | C  | A  | G  | G  | G  | T | G | G  | 12       | +         | 68329077  | 68329099  |
| TTR-OF11    | G | G | C | T | C | A | G | G | G | G  | C  | T  | C  | A  | G  | C  | A  | G  | G  | G  | T | G | G  | 3        | +         | 129512561 | 129512583 |
| TTR-OF12    | A | G | A | G | T | C | A | G | G | G  | C  | T  | C  | A  | G  | C  | A  | G  | G  | G  | A | G | G  | 17       | +         | 18256612  | 18256634  |
| TTR-OF13    | T | G | G | G | C | T | G | G | G | G  | C  | T  | C  | A  | G  | C  | A  | G  | G  | G  | A | G | G  | 7        | -         | 1057874   | 1057896   |
| TTR-OF14    | G | T | T | G | A | T | G | G | G | G  | C  | T  | C  | A  | G  | C  | A  | G  | G  | G  | T | G | G  | 11       | -         | 2894294   | 2894316   |
| TTR-OF15    | T | T | A | G | G | A | A | G | G | G  | C  | T  | C  | A  | G  | C  | A  | G  | G  | G  | T | G | G  | 9        | -         | 136104150 | 136104172 |
| TTR-OF16    | G | G | A | A | T | G | G | A | G | G  | C  | T  | C  | A  | G  | C  | A  | G  | G  | G  | T | G | G  | 17       | -         | 17627042  | 17627064  |
| TTR-OF17    | A | C | A | G | C | A | G | T | G | G  | C  | T  | C  | A  | G  | C  | A  | G  | G  | G  | A | G | G  | 2        | -         | 199141685 | 199141707 |
| TTR-OF18    | C | C | T | G | T | A | G | G | C | G  | C  | T  | C  | A  | G  | C  | A  | G  | G  | G  | T | G | G  | 9        | +         | 137070161 | 137070183 |
| TTR-OF19    | G | C | T | A | T | A | G | A | G | G  | C  | T  | C  | A  | G  | C  | A  | G  | G  | G  | A | G | G  | 12       | +         | 12331390  | 12331412  |
| TTR-OF20    | G | T | G | G | T | C | G | A | G | G  | C  | T  | C  | A  | G  | C  | A  | G  | G  | G  | C | G | G  | 2        | +         | 120794406 | 120794428 |
| TTR-OF21    | G | T | A | G | A | T | A | G | G | G  | C  | T  | C  | A  | G  | C  | A  | G  | G  | G  | G | G | G  | 10       | +         | 13995879  | 13995901  |



Supplementary Table 3 Summary of the off-target sites for RPE65

| Position    | 1 | 2 | 3 | 4 | 5 | 6 | 7 | 8 | 9 | 10 | 11 | 12 | 13 | 14 | 15 | 16 | 17 | 18 | 19 | 20 | N | G | G | Location |        |           |           |
|-------------|---|---|---|---|---|---|---|---|---|----|----|----|----|----|----|----|----|----|----|----|---|---|---|----------|--------|-----------|-----------|
| target site | C | A | T | A | T | C | T | C | C | T  | A  | A  | C  | T  | T  | C  | A  | G  | G  | T  | T | G | G | Chr.     | Strand | Start     | End       |
| RPE65-OF1   | C | T | T | G | T | C | T | T | C | A  | A  | A  | C  | T  | T  | C  | A  | G  | G  | T  | T | A | G | 9        | -      | 117426716 | 117426738 |
| RPE65-OF2   | G | G | T | A | T | C | T | T | C | T  | A  | A  | A  | T  | T  | C  | A  | G  | G  | T  | G | G | G | 6        | -      | 106501910 | 106501932 |
| RPE65-OF3   | C | A | G | A | C | A | C | C | C | A  | A  | C  | T  | T  | C  | A  | G  | G  | T  | G  | G | G | G | 3        | +      | 28844733  | 28844755  |
| RPE65-OF4   | G | A | T | C | A | C | T | C | C | T  | A  | C  | C  | T  | T  | C  | A  | G  | G  | T  | G | G | G | 10       | +      | 60419751  | 60419773  |
| RPE65-OF5   | A | A | T | G | G | C | T | C | C | T  | A  | G  | C  | T  | T  | C  | A  | G  | G  | T  | A | G | G | 7        | +      | 119799948 | 119799970 |
| RPE65-OF6   | C | A | T | C | T | G | T | C | C | A  | A  | G  | C  | T  | T  | C  | A  | G  | G  | T  | G | G | G | 15       | +      | 80808417  | 80808439  |
| RPE65-OF7   | C | A | T | C | T | G | T | C | C | T  | G  | T  | C  | T  | T  | C  | A  | G  | G  | T  | T | G | G | 21       | -      | 21012624  | 21012646  |
| RPE65-OF8   | C | A | T | G | A | C | T | A | C | T  | A  | A  | C  | C  | T  | C  | A  | G  | G  | T  | T | G | G | 2        | -      | 20195444  | 20195466  |
| RPE65-OF9   | C | A | T | T | T | C | T | A | C | T  | T  | A  | G  | T  | T  | C  | A  | G  | G  | T  | A | G | G | 14       | +      | 81537161  | 81537183  |
| RPE65-OF10  | G | A | G | A | C | C | T | C | A | T  | A  | A  | C  | T  | T  | C  | A  | G  | G  | T  | C | A | G | 2        | -      | 24436599  | 24436621  |
| RPE65-OF11  | C | A | T | A | G | C | G | A | C | A  | A  | A  | C  | T  | T  | C  | A  | G  | G  | T  | T | G | G | 2        | -      | 173678502 | 173678524 |
| RPE65-OF12  | A | A | T | G | A | A | T | C | C | T  | A  | A  | C  | T  | T  | C  | A  | G  | G  | T  | G | A | G | 14       | +      | 20442316  | 20442338  |
| RPE65-OF13  | G | A | T | A | T | C | T | T | A | A  | A  | A  | C  | T  | T  | C  | A  | G  | G  | T  | T | G | G | 17       | -      | 11634934  | 11634956  |
| RPE65-OF14  | C | C | T | C | C | A | T | C | C | T  | A  | A  | C  | T  | T  | C  | A  | G  | G  | T  | G | G | G | 2        | +      | 218577991 | 218578013 |
| RPE65-OF15  | T | T | T | A | T | T | T | C | C | C  | A  | A  | C  | T  | T  | C  | A  | G  | G  | T  | A | A | G | 20       | -      | 41219765  | 41219787  |
| RPE65-OF16  | C | C | T | G | T | G | T | C | C | A  | A  | A  | C  | T  | T  | C  | A  | G  | G  | T  | G | G | G | 12       | -      | 76712189  | 76712211  |
| RPE65-OF17  | T | A | T | C | C | C | T | C | C | T  | A  | A  | C  | T  | T  | C  | A  | G  | G  | A  | C | A | G | 7        | +      | 82392310  | 82392332  |
| RPE65-OF18  | A | A | T | A | C | C | T | A | C | T  | A  | A  | C  | T  | T  | C  | A  | G  | G  | A  | T | G | G | 3        | -      | 128451040 | 128451062 |
| RPE65-OF19  | C | A | G | A | T | C | T | C | C | T  | C  | A  | A  | T  | T  | C  | A  | G  | G  | T  | G | G | G | 6        | +      | 167581892 | 167581914 |
| RPE65-OF20  | C | C | T | A | C | C | T | C | C | T  | T  | A  | T  | T  | T  | C  | A  | G  | G  | T  | T | G | G | 10       | +      | 69872858  | 69872880  |
| RPE65-OF21  | C | A | C | A | T | A | C | C | C | T  | A  | T  | C  | T  | T  | C  | A  | G  | G  | T  | A | G | G | 16       | -      | 52342604  | 52342626  |
| RPE65-OF22  | G | G | T | T | T | C | A | C | C | T  | A  | A  | C  | T  | T  | C  | A  | G  | G  | T  | A | G | G | 10       | -      | 57853408  | 57853430  |
| RPE65-OF23  | A | A | T | A | A | C | T | A | T | T  | A  | A  | C  | T  | T  | C  | A  | G  | G  | T  | G | G | G | 20       | -      | 32437696  | 32437718  |

Supplementary Table 4 Primers used in the study

| Primer name      | Sequence (5'-3')        | Product length (bp) | Usage                   |
|------------------|-------------------------|---------------------|-------------------------|
| TTR-ON-249-F     | TTTTTCGGGCTCTGGTG       | 249                 | On-target<br>detection  |
| TTR-ON-249-R     | TATGAGGTGAAAACACTGCTT   |                     |                         |
| RPE65-ON-248-F   | TGTCATTGCCTGTGCTCA      | 248                 |                         |
| RPE65-ON-248-R   | ACATGAGGCAGGAGGACAA     |                     |                         |
| COL9A2-ON-269-F  | GCCTCTGGATCTCAGTTTC     | 269                 |                         |
| COL9A2-ON-269-R  | ACAGAGTTGGTAACAAGGCA    |                     |                         |
| KCNJ11-ON-237-F  | TCCTGATCCTCATCGTGC      | 237                 |                         |
| KCNJ11-ON-237-R  | TGGTGGTCTTGCGTACCA      |                     |                         |
| ALDOB-ON-238-F   | AGGCAGACAGGGTCAAGG      | 238                 |                         |
| ALDOB-ON-238-R   | GGATTGGAGGAAAAGTTGC     |                     |                         |
| SITE6-ON-230-F   | GGGAAACGCCCATGCAATTA    | 230                 |                         |
| SITE6-ON-230-R   | GTCAACCAGTATCCCGGTGC    |                     |                         |
| SITE2-ON-236-F   | AGCTCCTGAGATACAGTCACGAG | 236                 |                         |
| SITE2-ON-236-R   | AGCTTCTGAAATGCTGTGCGTGT |                     |                         |
| RPE65-OF1-257-F  | CCAGAGCCCACTGATGTTGAT   | 257                 | Off-target<br>for RPE65 |
| RPE65-OF1-257-R  | AAAGCAGGCTGGGGGGA       |                     |                         |
| RPE65-OF2-252-F  | TGGGCAGTGTATATTAATTGG   | 252                 |                         |
| RPE65-OF2-252-R  | ACAGCTACAGCCAAGTCAGA    |                     |                         |
| RPE65-OF3-241-F  | GACGGTTACCAGAGTGCG      | 241                 |                         |
| RPE65-OF3-241-R  | ATCCCTGTGGCTCTCAATA     |                     |                         |
| RPE65-OF4-238-F  | AGTCCCTTCTCCTGCCTAC     | 238                 |                         |
| RPE65-OF4-238-R  | GAGAAAAGAAAAGCAAGGC     |                     |                         |
| RPE65-OF5-250-F  | TCAACTAATTACTCAAAGAGAAA | 250                 |                         |
| RPE65-OF5-250-R  | GGACATAAATAAATGCCCTA    |                     |                         |
| RPE65-OF6-243-F  | TTCCACTGCTGAGACCCT      | 243                 |                         |
| RPE65-OF6-243-R  | CCACTGTATCCTGGCTTG      |                     |                         |
| RPE65-OF7-262-F  | ATTTCTACTCCTGGTTTTGC    | 262                 |                         |
| RPE65-OF7-262-R  | CAGAGACCCAAGGAGAGC      |                     |                         |
| RPE65-OF8-274-F  | AAACATCTGAAATGATTCCTAAC | 274                 |                         |
| RPE65-OF8-274-R  | AGCCATTATCAGTAAACACCTC  |                     |                         |
| RPE65-OF9-275-F  | GTAAATTAAGTTTTTCATGCATA | 275                 |                         |
| RPE65-OF9-275-R  | CAAACATACTCCTCCACAATC   |                     |                         |
| RPE65-OF10-250-F | AATGAACAGAAACAACACCTAAG | 250                 |                         |
| RPE65-OF10-250-R | TGGCAACAGAGCGGAGACT     |                     |                         |
| RPE65-OF11-246-F | AGACCACTTTTCCTAAGTCACTA | 246                 |                         |
| RPE65-OF11-246-R | GAGGAAGAGTCAATAAAATGCT  |                     |                         |
| RPE65-OF12-267-F | AAGACAGTCTGGGAGGCAA     | 267                 |                         |
| RPE65-OF12-267-R | TTGGGGTAGTGCCAGAAA      |                     |                         |
| RPE65-OF13-273-F | CCATACCTGGTCATTCTGC     | 273                 |                         |
| RPE65-OF13-273-R | CCCTTGCTTTAAGTCAACG     |                     |                         |

|                  |                         |     |                       |
|------------------|-------------------------|-----|-----------------------|
| RPE65-OF14-248-F | CCCCTTTGGTACTGGATTGT    | 248 | Off-target<br>for TTR |
| RPE65-OF14-248-R | GCTTTTTTCCTCCTTTCCA     |     |                       |
| RPE65-OF15-249-F | AGCAAGCCCTATAACTCAAGA   | 249 |                       |
| RPE65-OF15-249-R | CTGATAGAGTAGCCGCCAT     |     |                       |
| RPE65-OF16-245-F | TTTTAATAGAGACGGGGTTTC   | 245 |                       |
| RPE65-OF16-245-R | CCTTCTTGCTATTTGCTGATT   |     |                       |
| RPE65-OF17-239-F | CCAACCTTTGAATGATGCC     | 239 |                       |
| RPE65-OF17-239-R | AAAAATGAGGTTACTCCGACA   |     |                       |
| RPE65-OF18-237-F | TCTTCCCTTCTGCCTCCTGT    | 237 |                       |
| RPE65-OF18-237-R | CTGCCATCGCCATCACG       |     |                       |
| RPE65-OF19-274-F | CGTGGCTAACTTGACCTCTG    | 274 |                       |
| RPE65-OF19-274-R | CTGGGACTGCTACCAATGTG    |     |                       |
| RPE65-OF20-234-F | TTGAAACCGTAAGAAGAGCC    | 234 |                       |
| RPE65-OF20-234-R | GGGTTTTGAAGGTGGAGC      |     |                       |
| RPE65-OF21-244-F | AAATAAATAAATAGCATCCTTCA | 244 |                       |
| RPE65-OF21-244-R | TTCACCTCAGACCAGCCT      |     |                       |
| RPE65-OF22-250-F | AAGTATTAGAAGTTTGAGAGAAG | 250 |                       |
| RPE65-OF22-250-R | AAAGTTTAGCCCTGGTT       |     |                       |
| RPE65-OF23-236-F | CCTGAGCTCTCCTGCAAG      | 236 |                       |
| RPE65-OF23-236-R | CCCTGTGCTGGCTTCTTT      |     |                       |
| TTR-OF1-236-F    | ACCTAAATGGGAGGCTTGC     | 236 |                       |
| TTR-OF1-236-R    | AGGACTCAACAACGCCCA      |     |                       |
| TTR-OF2-235-F    | CAGTGCGTTTCCAGGTAGT     | 235 |                       |
| TTR-OF2-235-R    | TGGTAGCAGTGGTAGGTGA     |     |                       |
| TTR-OF3-242-F    | AAATGTGTTTGAAGGAGCGAG   | 242 |                       |
| TTR-OF3-242-R    | GGGCTGGGACAGACCTCA      |     |                       |
| TTR-OF4-236-F    | GGAGGAAGCAGCAAAGAAG     | 236 |                       |
| TTR-OF4-236-R    | CCCACAGGACCACAGACC      |     |                       |
| TTR-OF5-265-F    | GCCCCGTCTCGCCCTAT       | 265 |                       |
| TTR-OF5-265-R    | CAGGGCAGTGACTACAGCGG    |     |                       |
| TTR-OF6-243-F    | TGCCAGGTGACAGTCAGAAC    | 243 |                       |
| TTR-OF6-243-R    | TATTTAGGGCATCTTGAGTCTCT |     |                       |
| TTR-OF7-235-F    | ATCAGCCACCTTGACAT       | 235 |                       |
| TTR-OF7-235-R    | TTAGAGTGAGGGTTGAGTTTG   |     |                       |
| TTR-OF8-239-F    | CAGATGAAGATGGGAGAAAG    | 239 |                       |
| TTR-OF8-239-R    | GCTACTTCAAAAATACCAGGA   |     |                       |
| TTR-OF9-250-F    | CAGGACTAGGAGCAAGATTG    | 250 |                       |
| TTR-OF9-250-R    | GGGGACCTAGCACATTTG      |     |                       |
| TTR-OF10-255-F   | TTCATCACCTCCCCTCAA      | 255 |                       |
| TTR-OF10-255-R   | GGGTGTCCCTGCTTCTCC      |     |                       |
| TTR-OF11-242-F   | TTCCTCCAGAGCACTTTC      | 242 |                       |
| TTR-OF11-242-R   | TCTTCCATTCAGTCACACC     |     |                       |
| TTR-OF12-247-F   | GAAGCGTGGTCAGGTTGT      | 247 |                       |

|                |                         |     |  |
|----------------|-------------------------|-----|--|
| TTR-OF12-247-R | CTATGAGCAGAGCTGGAAGA    |     |  |
| TTR-OF13-265-F | GGAGTGTGGGCGGCGAA       | 265 |  |
| TTR-OF13-265-R | TTCTGCATCTTGGCGCACTC    |     |  |
| TTR-OF14-243-F | CTCAAGAGTTCCAGACCCA     | 243 |  |
| TTR-OF14-243-R | TACAAATAAGACCCACATAA    |     |  |
| TTR-OF15-258-F | AGTGCCTCTGTGCAGTGGA     | 258 |  |
| TTR-OF15-258-R | TGGGACACCAGTGCTCTCT     |     |  |
| TTR-OF16-246-F | ATAATCCCACTACAGTCCCA    | 246 |  |
| TTR-OF16-246-R | GCTGGTGAGAGCATCCC       |     |  |
| TTR-OF17-258-F | GCCAGGGAAAGCTTGAAG      | 258 |  |
| TTR-OF17-258-R | CCTCTCTACTGGCAGGTCAT    |     |  |
| TTR-OF18-237-F | GGAGCGAACACCAGGCG       | 237 |  |
| TTR-OF18-237-R | CCTGCGCGAGATCGAGTC      |     |  |
| TTR-OF19-257-F | TGATAACGCCGCCTCTCTA     | 257 |  |
| TTR-OF19-257-R | ATTCTCCCTGCCAACCTTT     |     |  |
| TTR-OF20-272-F | AAGGTGAAGGGTTTCCAGT     | 272 |  |
| TTR-OF20-272-R | CTCTGGGTCTTGCACTT       |     |  |
| TTR-OF21-267-F | TGACATAAGCACACCATTCT    | 267 |  |
| TTR-OF21-267-R | AACTATGAGCAATAAACTTCTGT |     |  |
